# Supplementary material
Source: Springer Nature journal article supplement (https://www.springermedizin.de/resource/supplementary/12962_2008_76_MOESM2_ESM.pdf/9572086)
Supplement: MOESM2 [file 9572086]

Effect on WTP

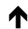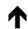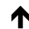

Main determinants

Degree of risk aversion

Perceived risk

Perceived size of the loss

Income

Variables in the study and their effect on the main determinants

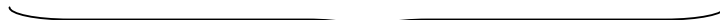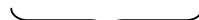

age ↑  
farmer ↑  
higher education ↑  
children 0 to 5 ↑  
elderly ↑

poor ↓  
rich ↑

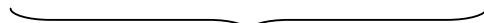

household members ↑  
chronic diseases ↑  
past need of health care ↑

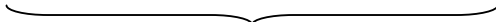

woman ↑

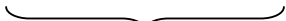

insurance experience ↑
